# Supplementary material for: Properties of polyethylene glycol/cyclodextrin hydrogels revealed by spin probes and spin labelling methods
Source: Royal Society of Chemistry journal article supplement (doi:10.1039/c3sm52004h), 2014-01-01

## Properties of polyethylene glycol/cyclodextrin hydrogels revealed by spin probe and spin labelling methods

Gabriela Ionita,<sup>\*a</sup> Ana Maria Ariciu<sup>a</sup>, Ioana Maria Turcu<sup>a</sup>, and Victor Chechik<sup>\*b</sup>

### Supporting information

**Figure S1.** EPR spectra of spin labelled PEG900/ $\beta$ -CD (10:1) in 273-353 K interval

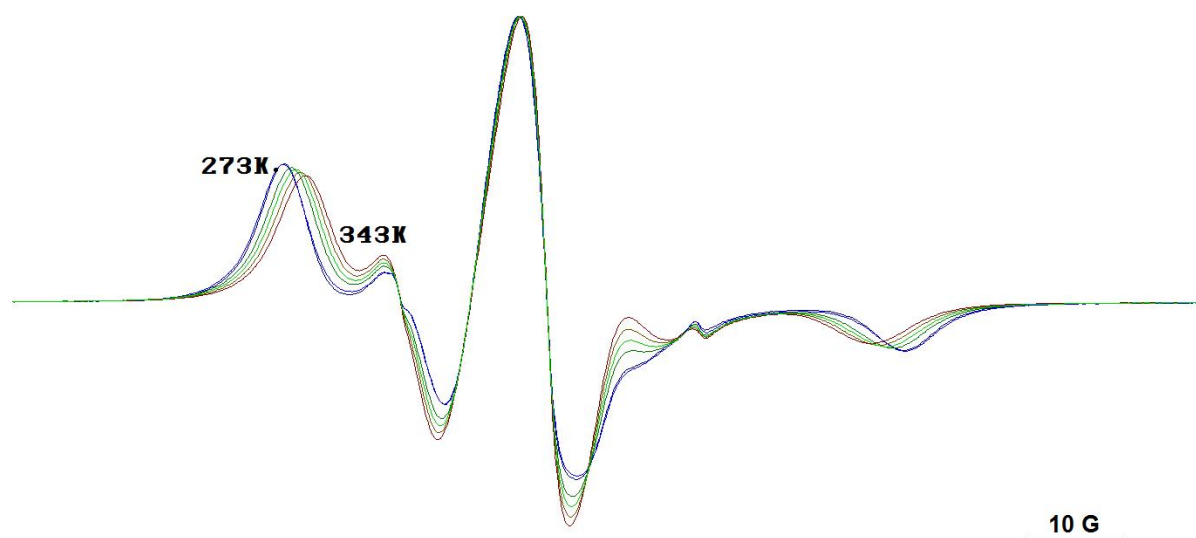

**Figure S2.** Simulation parameters for  $\beta$ -CD/PEG2000 spectra and Arrhenius plots for rotational diffusion rate.

Magnetic parameters:  $g_x=2.009$ ,  $g_y=2.0061$ ,  $g_z=2.0027$ ,  $A_{xx}=A_{yy}=6.8\text{G}$ ,  $A_{zz}=36.4\text{G}$ ,  $\beta_D=90^\circ$

| Temperature, K                                           | 293  | 300  | 313  | 323  | 333  | 343  | 353  |
|----------------------------------------------------------|------|------|------|------|------|------|------|
| % 1 <sup>st</sup> component                              | 93.7 | 93.9 | 94.8 | 93.5 | 95.5 | 95.6 | 95.5 |
| $\log(\bar{R})$ , 1 <sup>st</sup> component <sup>a</sup> | 7.46 | 7.53 | 7.65 | 7.69 | 7.74 | 7.84 | 7.85 |
| $\text{gib0}$ , 1 <sup>st</sup> component                | 0.03 | 0.03 | 0.01 | 0.01 | 0.01 | 0.01 | 0.01 |
| $\log(\bar{R})$ , 2 <sup>nd</sup> component              | 8.44 | 8.49 | 8.51 | 8.55 | 8.61 | 8.76 | 8.85 |
| $\text{gib0}$ , 2 <sup>nd</sup> component                | 1.88 | 1.20 | 1.30 | 1.47 | 1.48 | 1.47 | 1.38 |

$\bar{R}$  is isotropic rotational diffusion rate,  $\text{s}^{-1}$ ;  $\text{gib0}$  is peak to peak Gaussian inhomogeneous broadening, G.

### Arrhenius plot for the rotational diffusion rates

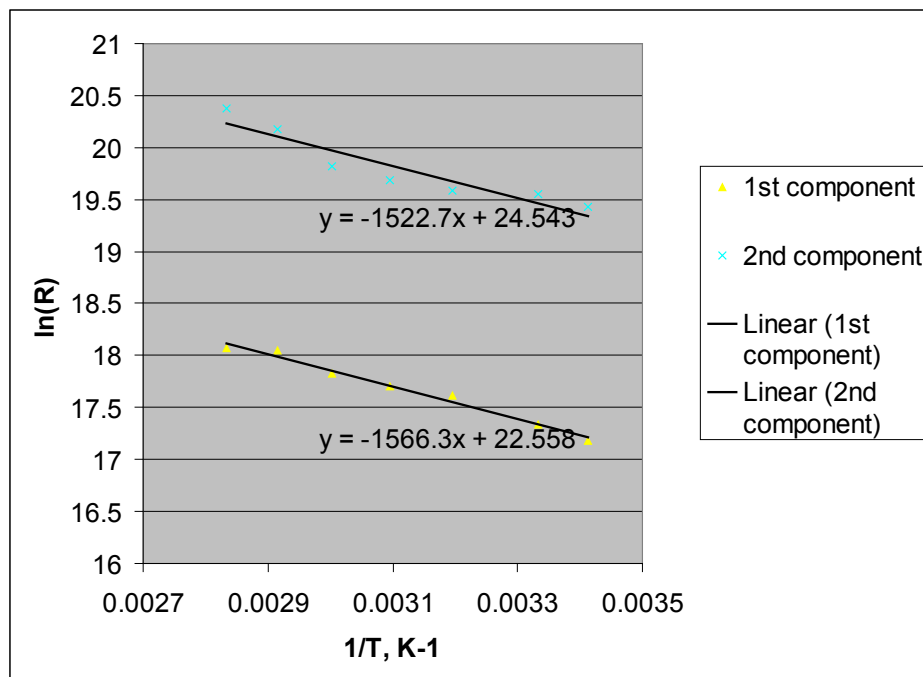

**Figure S3.** EPR spectra of AT in PEG900/ $\beta$ -CD (4:1, 10:1, 14:1) and in PEG2000/ $\beta$ -CD hydrogels recorded at room temperature

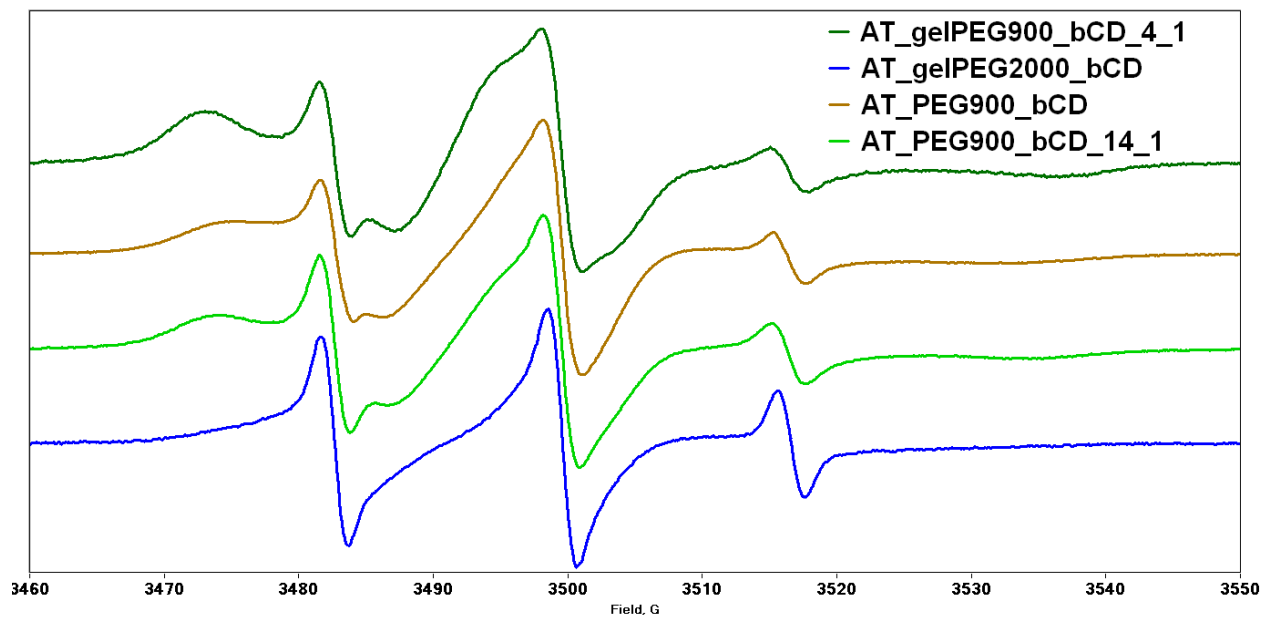

Figure S4 EPR spectra of AT loaded in the PEG2000/ $\beta$ -CD gel at different temperatures: 293 K (A), 273 K (B), 263 K (C), 258 K (D), 253 K (E), 248 K (F), 233 K (G) and 120 K (H).

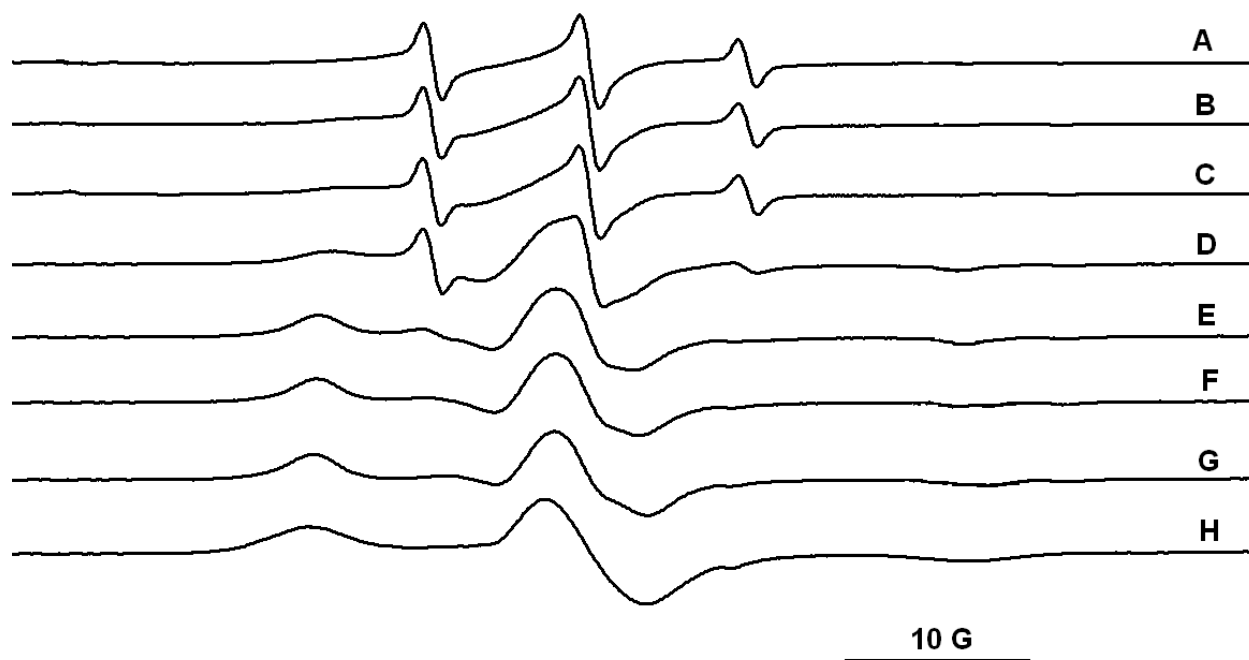

Supplement: c3sm52004h.pdf [file c3sm52004h.pdf]
